# Supplementary material for: Vibrio cholerae Chromosome Partitioning without Polar Anchoring by HubP
Source: MDPI journal article supplement (doi:10.3390/genes13050877), 2022-05-13
Supplement: s1 [file s1]

**Table S1.** List of strains used

| Names | Relevant genotype                                  | genotype                                                               | plasmid used or reference |
|-------|----------------------------------------------------|------------------------------------------------------------------------|---------------------------|
| ADV4  | WT                                                 | N16961 attB Tn7::hapR+,<br>lacZ ::(LacI-mCherry , yGFP-parBT1)         | [8]                       |
| ADV22 | WT                                                 | ADV4 parST1 -cat @ L3I : 2,31 Mb ,<br>LacOarray -Kan @ L1I : 2,66 Mb   | [8]                       |
| ADV24 | WT                                                 | ADV4 parST1 -cat @ L3I : 2,31 Mb ,<br>LacOarray -Kan @ ori1 : 0,05 Mb  | [8]                       |
| ADV25 | WT                                                 | ADV4 parST1 -cat @ L3I : 2,31 Mb ,<br>LacOarray -Kan @ R2I : 0,85 Mb   | [8]                       |
| ADV27 | WT                                                 | ADV4, lacOarray -Kan @ ori2 : 1,05 Mb<br>parST1 -cat @ R3II : 0,312 Mb | [8]                       |
| ADV40 | $\Delta$ 3parS1                                    | ADV24 parS1::zeoR                                                      | pPOS188                   |
| ADV41 | $\Delta$ 3parS1                                    | ADV25 parS1::zeoR                                                      | pPOS188                   |
| ADV80 | WT                                                 | ADV4, parST1 -cat @ R1II : 0,064 Mb                                    | pAD39                     |
| CP578 | WT                                                 | ADV80, tet-parS1-arr2-parS1-tet @ R1II : 0,064 Mb                      | pPOS184                   |
| CP768 | $\Delta$ parAB2                                    | CP578,LacOarray -Kan @ L1I : 2,66 Mb                                   | pPOS209                   |
| CP688 | $\Delta$ hubP                                      | ADV25 hubP::zeoR                                                       | pEG266                    |
| CP700 | $\Delta$ hubP                                      | ADV24 hubP::zeoR                                                       | pEG266                    |
| CP770 | $\Delta$ parAB2                                    | ADV80, parAB2::aad1                                                    | pPOS209                   |
| CP789 | $\Delta$ parAB2,<br>ori2 ::2parS1                  | CP770, tet-parS1-arr2-parS1-tet @ R1II : 0,064 Mb,                     | pPOS184                   |
| CP797 | $\Delta$ parAB2, ori2 ::2parS1I,<br>$\Delta$ hubP  | CP789, hubP::zeoR                                                      | pEG266                    |
| CP799 | $\Delta$ parAB2, ori2 ::2parS1,<br>$\Delta$ 3parS1 | CP789, 3parS1::zeoR                                                    | pPOS188                   |

Tables S2. List of Plasmids used

| Plasmid                                                                                                  | Description                                                                                                     |
|----------------------------------------------------------------------------------------------------------|-----------------------------------------------------------------------------------------------------------------|
| <b>Reference / construction*</b>                                                                         |                                                                                                                 |
| pXX705                                                                                                   | Mini-F plasmid vector; Fori, Amp-R                                                                              |
| [35]                                                                                                     |                                                                                                                 |
| pYB145                                                                                                   | pXX705 parAB2 parS2                                                                                             |
| [32]                                                                                                     |                                                                                                                 |
| pYB153                                                                                                   | TOPO-parAB1                                                                                                     |
| parAB1 genes was amplified with YPR254 x YPR255 then cloned into pCR Blunt II-TOPO vector (ThermoFisher) |                                                                                                                 |
| pYB164                                                                                                   | pXX705 parS1                                                                                                    |
| parS1 dsDNA was generated by annealing YPR179 and YPR180, and cloned into the EcoRI site of pXX705.      |                                                                                                                 |
| pYB167                                                                                                   | pXX705 parAB1 parS1                                                                                             |
| parAB1 fragment was obtained by BamHI digestion of pYB153 and cloned into pYB164                         |                                                                                                                 |
| pYB172                                                                                                   | pXX705 parAB1                                                                                                   |
| parAB1 fragment was obtained by BamHI digestion of pYB153 and cloned into pXX705                         |                                                                                                                 |
| pGD162                                                                                                   | ; sacB ; ori R6K ; Tet'-zeo-'Tet cassette ; CmR, ZeoR                                                           |
| [8]                                                                                                      |                                                                                                                 |
| pAD19                                                                                                    | sacB ; ori R6K ; YGFP-ParBT1 and LacI-mcherry between Up- and Down-stream regions of V.cholerae LacZ gene ; CmR |
| [8]                                                                                                      |                                                                                                                 |
| pAD20                                                                                                    | sacB ; ori R6K ; LacO array + KanR between TetR homologies ; CmR, Kan                                           |
| [8]                                                                                                      |                                                                                                                 |
| pAD22                                                                                                    | integration-excision vector ; sacB ; Tet-Zeo-Tet cassette between homologies around LII ; CmR, ZeoR             |
| [8]                                                                                                      |                                                                                                                 |
| pAD39                                                                                                    | sacB ; ori R6K ; Tet'-parST1- FRT-CmR-FRT-'Tet ; CmR                                                            |
| [8]                                                                                                      |                                                                                                                 |
| pPOS188                                                                                                  | sacB ; ori R6K ; $\Delta$ 3parSI :: zeoR                                                                        |
| See Mat. & Met.                                                                                          |                                                                                                                 |
| pPOS184                                                                                                  | sacB ; ori R6K ; parSI-FRT-Rif-FRT-parSI between TetR homologies ; CmR, Rif                                     |
| [8]                                                                                                      |                                                                                                                 |
| pPOS209                                                                                                  | sacB ; ori R6K ; $\Delta$ parAB2 :: specR                                                                       |
| See Mat. & Met.                                                                                          |                                                                                                                 |
| pEG266                                                                                                   | sacB ; ori R6K ; $\Delta$ hubP :: zeoR                                                                          |
| [58]                                                                                                     |                                                                                                                 |

Table S3. Oligo DNAs used in plasmids construction

| Name            | Sequence (5'-3')                      |
|-----------------|---------------------------------------|
| YPR179          | AATTCGTTTCACGTGAAACAG                 |
| YPR180          | AATTCTGTTTCACGTGAAACGG                |
| YPR254          | CGGGATCCAATCACCACAGCTCGAAC            |
| YPR255          | CGGGATCCGCGGCCGCGAGTGGAAGAGTTTGATCCTG |
| parAB2 DW SacI  | CCgagctcGCAAAGGATTGGTACTTTCTGCAG      |
| parAB2 DW XhoI  | GCctcgagGTCAACTCAAATAACAAAGCCC        |
| parAB2 UP BamHI | GCggatccTTTCCGTTATTAGGGCTTTAAAC       |
| parAB2 UP xbaI  | CCtctagaGCAATGAATTACATGCTTCCGCG       |
| parS1 UP1 xbaI  | GGCTtctagaCATGAGGCGCCATTCTATACCC      |
| parS1DW1 BamHI  | CTGCggatccATGCACAAACCATCTCCAATCG      |
| parS1 UP2 xhoI  | GCGTctcgagCAGTTATTGCTGGCCCATTAG       |
| parS1 DW2 sacI  | GGCTgagctcCAGAATGCGAGCCATTTCATAG      |
